# Supplementary material for: Relationship between internet addiction and sleep disturbance in high school students: a cross-sectional study
Source: Springer Nature journal article supplement (doi:10.1186/s12887-020-02275-7), 2020-08-11
Supplement: MOESM1 [file 18267524]

Additional file 1: Questions regarding daily life habits

| Question                                                                                                                                                                   | Responses                                                                                                             |
|----------------------------------------------------------------------------------------------------------------------------------------------------------------------------|-----------------------------------------------------------------------------------------------------------------------|
| <p><b>School-commute time</b><br/>How much time do you spend traveling to school?</p>                                                                                      | <p>&lt;0.5 hours<br/>≥0.5 hours, &lt;1 hour<br/>≥1 hour, &lt;2 hours<br/>≥2 hours</p>                                 |
| <p><b>School sports or clubs</b><br/>Over the past months, how much time did you spend on average per day engaging in school sports or club activities?</p>                | <p>None<br/>&lt;1 hour<br/>≥1 hour, &lt;2 hours<br/>≥2 hours.</p>                                                     |
| <p><b>Extracurricular learning</b><br/>Over the past months, how much time did you spend on average per day in studying outside of school classes?</p>                     | <p>None<br/>&lt;1 hour<br/>≥1 hour, &lt;2 hours<br/>≥2 hours</p>                                                      |
| <p><b>Television viewing time</b><br/>Over the past months, how much time did you spend on average per day watching television programs (including recorded programs)?</p> | <p>None<br/>&lt;1 hour<br/>≥1 hour, &lt;2 hours<br/>≥2 hours, &lt;3 hours<br/>≥3 hours, &lt;5 hours<br/>≥5 hours</p>  |
| <p><b>Skipped meals</b><br/>Over the past 30 days, did you ever skip (not eat) a meal or meals.</p>                                                                        | <p>No<br/>&lt;2 times/week<br/>≥2times/week, &lt;7times/week<br/>≥7times/week, &lt;14times/week<br/>≥14times/week</p> |
| <p><b>Depressed mood</b><br/>Over the past 30 days, did you have feelings of heaviness or depression more than usual?</p>                                                  | <p>Not at all<br/>Not so much<br/>Yes<br/>Often</p>                                                                   |
| <p><b>School-life satisfaction</b><br/>Are you satisfied with your school life? Or are you dissatisfied with it?"</p>                                                      | <p>Satisfied<br/>More or less satisfied<br/>Not really satisfied<br/>Dissatisfied</p>                                 |
